# Supplementary material for: Trends and impact of intravascular ultrasound and optical coherence tomography on percutaneous coronary intervention for myocardial infarction
Source: PubMed Central journal article supplement — Int J Cardiol Heart Vasc. 2023 Feb 13;45:101186. doi: 10.1016/j.ijcha.2023.101186 (PMC9957744; doi:10.1016/j.ijcha.2023.101186), 2023-02-13

Table S1. List of the ICD-10-CM and ICD-10-PCS codes used

| Diagnosis                              | ICD-10 Code                                                                                                                                                                                                                                                    | ICD-9 Code                 |
|----------------------------------------|----------------------------------------------------------------------------------------------------------------------------------------------------------------------------------------------------------------------------------------------------------------|----------------------------|
| Drug-eluting stent*                    | 027034, 027035, 027036, 027037, 027044, 027045, 027046, 027047, 027134, 027135, 027136, 027137, 027144, 027145, 027146, 027147, 027234, 027235, 027236, 027237, 027244, 027245, 027246, 027247, 027334, 027335, 027336, 027337, 027344, 027345, 027346, 027347 | 36.07                      |
| Bare-metal stent*                      | 02703D, 02703E, 02703F, 02703G, 02704D, 02704E, 02704F, 02704G, 02713D, 02713E, 02713F, 02713G, 02714D, 02714E, 02714F, 02714G, 02723D, 02723E, 02723F, 02723G, 02724D, 02724E, 02724F, 02724G, 02733D, 02733E, 02733F, 02733G, 02734D, 02734E, 02734F, 02734G | 36.06                      |
| Intravascular ultrasound*              | B240ZZ3, B241ZZ3                                                                                                                                                                                                                                               | 00.24                      |
| Optical coherence tomography*          | B221ZZZ, B223ZZZ                                                                                                                                                                                                                                               | 38.24                      |
| Intra-aortic balloon pump*             | 5A02110, 5A02210                                                                                                                                                                                                                                               | 37.61                      |
| ECMO*                                  | 5A15                                                                                                                                                                                                                                                           | 39.65                      |
| Renal replacement therapy*             | 5A1D                                                                                                                                                                                                                                                           | 39.95                      |
| Mechanical ventilation*                | 5A1935Z, 5A1945Z, 5A1955Z                                                                                                                                                                                                                                      | 96.70, 96.71, 96.72        |
| Mechanical thrombectomy*               | 02C03, 02C04, 02C13, 02C14, 02C23, 02C24, 02C33, 02C34                                                                                                                                                                                                         | 36.09, 17.55               |
| Myocardial infarction                  | I21, I22                                                                                                                                                                                                                                                       | 410                        |
| ST-elevation myocardial infarction     | I21.0, I21.1, I21.2, I21.3, I21.9, I22.0, I22.1, I22.8, I22.9                                                                                                                                                                                                  | I21.4, I21.A, I22.2        |
| Non-ST-elevation myocardial infarction | 410.0, 410.1, 410.1, 410.2, 410.3, 410.4, 410.5, 410.6, 410.8, 410.9                                                                                                                                                                                           | 410.7                      |
| Smoking                                | F17, T65, Z72.0, O99.33, Z87.891                                                                                                                                                                                                                               | V15.82, 305.1              |
| Hypertension                           | I10                                                                                                                                                                                                                                                            | 401                        |
| Diabetes mellitus                      | E08, E10, E11, E13                                                                                                                                                                                                                                             | 250                        |
| Hyperlipidemia                         | E78                                                                                                                                                                                                                                                            | 272                        |
| Obesity                                | E66                                                                                                                                                                                                                                                            | 278.0                      |
| Heart failure                          | I09.81, I11.0, I13.0, I31.2, I50                                                                                                                                                                                                                               | 428                        |
| Chronic IHD                            | I25                                                                                                                                                                                                                                                            | 412, 414                   |
| Atrial fibrillation                    | I48.0, I48.1, I48.2, I48.91                                                                                                                                                                                                                                    | 427.3                      |
| Valvular heart disease                 | I34, I35, I36, I37                                                                                                                                                                                                                                             | 424.0, 424.1, 424.2, 424.3 |
| Peripheral artery disease              | I70                                                                                                                                                                                                                                                            | 440, 443.9                 |
| Previous stroke                        | I69, Z86.73                                                                                                                                                                                                                                                    | 438, V12.54                |
| Previous PCI                           | Z98.61                                                                                                                                                                                                                                                         | V45.82                     |
| Previous CABG                          | Z95.1                                                                                                                                                                                                                                                          | V45.81                     |
| Pacemaker                              | Z95.0                                                                                                                                                                                                                                                          | V45.01                     |
| Pulmonary hypertension                 | I27.0, I27.2                                                                                                                                                                                                                                                   | 416.0, 416.8               |
| Chronic kidney disease                 | N18                                                                                                                                                                                                                                                            | 585                        |
| End-stage renal disease                | N18.6                                                                                                                                                                                                                                                          | 585.6                      |
| Liver cirrhosis                        | K70.2, K70.3, K71.7, K74, K76.1, P78.81, E83.110                                                                                                                                                                                                               | 571.2, 571.5, 571.6, 573.0 |
| History of malignancy                  | Z85                                                                                                                                                                                                                                                            | V10                        |
| Deficiency anemia                      | D50, D51, D52, D53                                                                                                                                                                                                                                             | 280, 281                   |
| Malnutrition                           | E43, E44, E46                                                                                                                                                                                                                                                  | 262, 263                   |
| Major depression                       | F33                                                                                                                                                                                                                                                            | 290, 291.2, 294, 331       |
| Cardiogenic shock                      | R57.0                                                                                                                                                                                                                                                          | 785.51                     |

\*ICD-10-PCS (second column) or ICD-9-PCS codes (third column)

Abbreviations: ECMO = extracorporeal membranous oxygenation; IHD = ischemic heart disease; PCI = percutaneous coronary intervention

Table S2. Baseline characteristics of hospitalizations in which PCI with stent was performed for myocardial infarction from 2008 to 2019

|                                  | 2008           | 2009           | 2010           | 2011           | 2012           | 2013           | 2014           | 2015 <sup>a</sup> | 2016           | 2017           | 2018           | 2019           | P-trend |
|----------------------------------|----------------|----------------|----------------|----------------|----------------|----------------|----------------|-------------------|----------------|----------------|----------------|----------------|---------|
| <b>N (sample)</b>                | 38,752         | 40,207         | 40,284         | 45,142         | 47,326         | 47,748         | 48,943         | 50,972            | 53,827         | 55,780         | 56,811         | 58,371         | <.001   |
| <b>N (weighted)</b>              | 181,629        | 195,428        | 196,565        | 209,234        | 236,630        | 238,740        | 244,715        | 254,860           | 269,135        | 278,900        | 284,055        | 291,855        | <.001   |
| <b>Intravascular Imaging (%)</b> |                |                |                |                |                |                |                |                   |                |                |                |                |         |
| IVUS                             | 3.4            | 4.4            | 3.7            | 5.2            | 5.4            | 5.1            | 5.3            | 4.9               | 5.4            | 5.9            | 6.8            | 8.7            | <.001   |
| OCT                              | 0.0            | 0.0            | 0.0            | 0.1            | 0.2            | 0.2            | 0.2            | 0.2               | 0.3            | 0.3            | 0.3            | 0.6            | <.001   |
| <b>Sex (%)</b>                   |                |                |                |                |                |                |                |                   |                |                |                |                |         |
| Male                             | 68.1           | 68.2           | 68.8           | 68.1           | 68.3           | 68.4           | 68.5           | 67.9              | 67.9           | 67.9           | 67.8           | 68.2           | 0.042   |
| Female                           | 31.9           | 31.8           | 31.2           | 31.9           | 31.7           | 31.6           | 31.5           | 32.1              | 32.1           | 32.1           | 32.2           | 31.8           | 0.042   |
| <b>Age</b>                       |                |                |                |                |                |                |                |                   |                |                |                |                |         |
| Mean (SD)                        | 62.7<br>(13.2) | 62.9<br>(13.2) | 62.7<br>(13.1) | 62.9<br>(13.0) | 63.1<br>(12.9) | 63.2<br>(12.8) | 63.3<br>(12.8) | 63.7<br>(12.7)    | 63.9<br>(12.7) | 64.1<br>(12.6) | 64.4<br>(12.6) | 64.6<br>(12.6) | <.001   |
| <65 (%)                          | 56.7           | 56.4           | 57.6           | 56.5           | 55.7           | 54.9           | 54.3           | 53.2              | 52.3           | 51.8           | 50.3           | 49.8           | <.001   |
| 65-74 (%)                        | 21.7           | 21.9           | 21.6           | 22.5           | 23.3           | 24.3           | 24.8           | 25.4              | 25.7           | 26.2           | 26.8           | 27.0           | <.001   |
| 75-84 (%)                        | 16.5           | 16.2           | 15.6           | 15.4           | 15.4           | 15.3           | 15.4           | 15.7              | 16.1           | 16.1           | 16.8           | 17.1           | <.001   |
| ≥85 (%)                          | 5.2            | 5.5            | 5.2            | 5.6            | 5.6            | 5.5            | 5.6            | 5.8               | 5.8            | 5.9            | 6.1            | 6.1            | <.001   |
| <b>Race (%)</b>                  |                |                |                |                |                |                |                |                   |                |                |                |                |         |
| White                            | 79.0           | 78.2           | 78.1           | 76.9           | 77.3           | 77.6           | 77.7           | 77.3              | 77.1           | 75.9           | 75.5           | 76.0           | <.001   |
| Black                            | 7.5            | 8.2            | 9.1            | 8.9            | 9.0            | 8.6            | 8.7            | 9.1               | 9.2            | 9.4            | 9.2            | 9.2            | <.001   |
| Hispanic                         | 6.2            | 7.0            | 7.1            | 7.4            | 7.2            | 7.6            | 7.4            | 7.7               | 7.5            | 8.3            | 8.7            | 8.2            | <.001   |
| Asian                            | 2.1            | 2.0            | 2.1            | 2.1            | 2.0            | 2.2            | 2.2            | 2.4               | 2.5            | 2.6            | 2.7            | 2.8            | <.001   |
| AI/AN                            | 1.1            | 0.6            | 0.8            | 0.4            | 0.6            | 0.5            | 0.5            | 0.5               | 0.5            | 0.5            | 0.6            | 0.6            | <.001   |
| Other                            | 4.1            | 4.1            | 2.8            | 4.2            | 3.9            | 3.5            | 3.5            | 3.1               | 3.2            | 3.2            | 3.2            | 3.2            | <.001   |
| <b>Comorbidities (%)</b>         |                |                |                |                |                |                |                |                   |                |                |                |                |         |
| Smoking                          | 42.6           | 44.0           | 44.6           | 45.3           | 46.9           | 48.0           | 44.7           | 51.5              | 53.0           | 53.2           | 53.5           | 52.7           | <.001   |
| Hypertension                     | 55.9           | 56.8           | 57.1           | 57.9           | 59.0           | 59.3           | 60.4           | 60.8              | 58.9           | 48.5           | 47.1           | 46.2           | <.001   |
| Diabetes mellitus                | 28.5           | 29.7           | 30.2           | 32.6           | 33.1           | 34.0           | 34.5           | 35.9              | 36.3           | 36.9           | 37.8           | 38.4           | <.001   |
| Hyperlipidemia                   | 63.2           | 65.1           | 66.8           | 67.9           | 68.8           | 69.3           | 69.3           | 68.7              | 70.0           | 70.1           | 70.7           | 71.9           | <.001   |
| Obesity                          | 11.4           | 13.3           | 13.2           | 14.7           | 15.8           | 16.6           | 17.4           | 18.0              | 18.6           | 19.3           | 21.1           | 21.4           | <.001   |
| Heart failure                    | 15.9           | 16.9           | 17.0           | 18.2           | 18.0           | 19.3           | 19.7           | 21.5              | 22.7           | 25.0           | 26.1           | 27.3           | <.001   |
| Chronic IHD                      | 91.6           | 92.0           | 91.1           | 91.9           | 91.8           | 91.7           | 91.6           | 91.2              | 90.2           | 89.5           | 89.1           | 89.0           | <.001   |
| Atrial fibrillation              | 9.5            | 10.0           | 9.6            | 10.8           | 11.0           | 10.9           | 11.5           | 12.5              | 12.5           | 12.7           | 13.2           | 13.4           | <.001   |
| Valvular heart disease           | 6.0            | 6.0            | 6.0            | 6.3            | 6.5            | 6.5            | 6.8            | 7.2               | 7.0            | 6.9            | 6.9            | 6.5            | <.001   |
| PAD                              | 6.3            | 7.3            | 6.3            | 7.1            | 7.1            | 7.2            | 7.3            | 7.6               | 7.6            | 6.7            | 5.7            | 5.6            | <.001   |
| Previous stroke                  | 4.0            | 5.1            | 4.8            | 5.8            | 5.8            | 6.2            | 6.5            | 7.0               | 7.4            | 7.8            | 7.7            | 7.8            | <.001   |
| Previous CABG                    | 4.1            | 4.3            | 4.0            | 4.6            | 4.7            | 4.8            | 5.0            | 5.9               | 7.3            | 7.5            | 7.6            | 7.2            | <.001   |
| Previous pacemaker               | 1.4            | 1.5            | 1.4            | 1.6            | 1.6            | 1.7            | 1.6            | 1.7               | 1.9            | 1.9            | 2.0            | 1.9            | <.001   |
| Chronic pulmonary disease        | 15.0           | 15.2           | 14.9           | 15.5           | 16.1           | 16.5           | 16.7           | 17.1              | 17.1           | 17.5           | 17.6           | 17.7           | <.001   |
| Pulmonary hypertension           | 1.7            | 2.0            | 2.0            | 2.5            | 2.3            | 2.6            | 2.6            | 2.9               | 3.0            | 3.2            | 3.3            | 3.4            | <.001   |
| Chronic kidney disease           | 8.9            | 10.8           | 11.0           | 12.1           | 12.2           | 13.0           | 13.5           | 14.8              | 16.0           | 16.5           | 17.1           | 18.1           | <.001   |
| End-stage renal disease          | 1.7            | 2.0            | 2.1            | 2.4            | 2.1            | 2.3            | 2.5            | 2.7               | 2.8            | 3.0            | 3.0            | 3.1            | <.001   |

|                                  |      |      |      |      |      |      |      |      |      |      |      |      |       |
|----------------------------------|------|------|------|------|------|------|------|------|------|------|------|------|-------|
| Liver cirrhosis                  | 0.3  | 0.3  | 0.3  | 0.4  | 0.4  | 0.4  | 0.5  | 0.5  | 0.6  | 0.6  | 0.7  | 0.7  | <.001 |
| History of malignancy            | 5.4  | 6.0  | 5.8  | 6.5  | 6.5  | 6.9  | 7.0  | 7.3  | 7.6  | 8.1  | 8.0  | 8.6  | <.001 |
| Deficiency anemia                | 1.8  | 2.1  | 2.0  | 2.1  | 1.9  | 1.9  | 1.9  | 2.1  | 2.4  | 2.4  | 2.5  | 2.4  | <.001 |
| Malnutrition                     | 0.7  | 0.8  | 0.9  | 1.0  | 1.0  | 1.1  | 1.1  | 1.1  | 1.2  | 1.4  | 1.5  | 1.6  | <.001 |
| Dementia                         | 1.8  | 2.1  | 1.9  | 2.3  | 2.3  | 2.2  | 2.3  | 2.4  | 2.4  | 2.4  | 2.3  | 2.6  | <.001 |
| Major depression                 | 0.4  | 0.3  | 0.3  | 0.3  | 0.5  | 0.4  | 0.5  | 0.5  | 0.2  | 0.4  | 0.5  | 0.5  | <.001 |
| <b>Hospital characteristics</b>  |      |      |      |      |      |      |      |      |      |      |      |      |       |
| <b>Hospital region (%)</b>       |      |      |      |      |      |      |      |      |      |      |      |      |       |
| Northwest                        | 19.4 | 20.0 | 20.2 | 17.7 | 17.7 | 17.5 | 17.4 | 17.2 | 17.0 | 16.9 | 16.5 | 16.6 | <.001 |
| Midwest                          | 17.0 | 18.2 | 20.8 | 19.4 | 21.7 | 22.0 | 22.1 | 22.3 | 23.3 | 23.0 | 22.8 | 23.6 | <.001 |
| South                            | 45.3 | 42.2 | 39.6 | 43.0 | 42.7 | 43.1 | 43.1 | 43.1 | 42.3 | 41.8 | 41.8 | 41.0 | <.001 |
| West                             | 18.3 | 19.5 | 19.4 | 19.9 | 18.0 | 17.4 | 17.5 | 17.4 | 17.4 | 18.2 | 18.9 | 18.7 | <.001 |
| <b>Hospital bed size (%)</b>     |      |      |      |      |      |      |      |      |      |      |      |      |       |
| Small                            | 6.7  | 5.7  | 8.0  | 7.4  | 8.3  | 7.9  | 23.6 | 12.6 | 13.0 | 14.7 | 16.2 | 17.4 | <.001 |
| Medium                           | 21.5 | 19.1 | 18.6 | 22.6 | 23.5 | 24.1 | 28.8 | 30.0 | 29.1 | 30.7 | 30.5 | 30.2 | <.001 |
| Large                            | 71.8 | 75.3 | 73.4 | 70.0 | 68.2 | 68.0 | 56.7 | 57.4 | 58.0 | 54.6 | 53.3 | 52.4 | <.001 |
| <b>Urban location (%)</b>        |      |      |      |      |      |      |      |      |      |      |      |      |       |
| Rural                            | 6.7  | 5.9  | 9.4  | 4.3  | 6.5  | 7.0  | 5.8  | 5.7  | 5.6  | 5.9  | 5.9  | 6.3  | <.001 |
| Urban non-teaching               | 44.6 | 42.9 | 43.9 | 45.1 | 40.3 | 39.4 | 28.5 | 28.9 | 27.5 | 22.9 | 20.7 | 17.8 | <.001 |
| Urban teaching                   | 48.7 | 51.2 | 46.7 | 50.6 | 53.3 | 53.6 | 65.8 | 65.4 | 66.9 | 71.2 | 73.5 | 75.9 | <.001 |
| <b>Primary payer (%)</b>         |      |      |      |      |      |      |      |      |      |      |      |      |       |
| Medicare                         | 42.5 | 43.3 | 42.5 | 44.7 | 45.8 | 46.1 | 46.5 | 47.8 | 48.3 | 48.7 | 49.6 | 49.8 | <.001 |
| Medicaid                         | 5.8  | 5.8  | 7.1  | 6.9  | 7.0  | 6.8  | 9.2  | 9.7  | 9.7  | 9.9  | 9.5  | 9.5  | <.001 |
| Private insurance                | 39.5 | 38.2 | 37.1 | 35.2 | 33.4 | 33.3 | 34.0 | 33.2 | 32.9 | 32.2 | 31.4 | 31.4 | <.001 |
| Self-pay                         | 7.9  | 8.5  | 8.9  | 8.8  | 9.5  | 9.1  | 6.8  | 5.9  | 5.5  | 5.7  | 5.9  | 5.8  | <.001 |
| No charge                        | 0.8  | 0.8  | 0.7  | 1.0  | 0.8  | 1.0  | 0.7  | 0.6  | 0.5  | 0.4  | 0.5  | 0.5  | <.001 |
| Others                           | 3.5  | 3.6  | 3.7  | 3.4  | 3.6  | 3.5  | 2.8  | 3.0  | 3.1  | 3.0  | 3.0  | 3.1  | <.001 |
| <b>Median income (%)</b>         |      |      |      |      |      |      |      |      |      |      |      |      |       |
| Quartile 1                       | 26.7 | 26.1 | 28.6 | 27.4 | 30.2 | 28.7 | 28.9 | 30.6 | 29.6 | 29.2 | 28.4 | 29.6 | <.001 |
| Quartile 2                       | 28.6 | 27.0 | 26.0 | 25.0 | 26.4 | 27.0 | 29.1 | 25.9 | 27.1 | 28.1 | 28.0 | 26.4 | 0.012 |
| Quartile 3                       | 23.1 | 25.7 | 24.1 | 26.4 | 23.6 | 23.5 | 23.3 | 24.4 | 24.5 | 23.8 | 24.7 | 24.9 | 0.895 |
| Quartile 4                       | 21.6 | 21.2 | 21.3 | 21.3 | 20.0 | 18.6 | 18.8 | 19.2 | 18.9 | 19.0 | 18.9 | 19.1 | <.001 |
| <b>Clinical presentation (%)</b> |      |      |      |      |      |      |      |      |      |      |      |      |       |
| STEMI                            | 53.2 | 50.4 | 50.9 | 49.5 | 47.7 | 46.8 | 45.9 | 45.2 | 44.4 | 43.7 | 43.5 | 43.4 | <.001 |
| NSTEMI                           | 46.8 | 49.6 | 49.1 | 50.5 | 52.3 | 53.2 | 54.1 | 54.8 | 55.6 | 56.3 | 46.5 | 56.6 | <.001 |

<sup>a</sup>ICD-9-CM/PCS codes changed to ICD-10-CM/PCS codes beginning October 2015

Abbreviations: AI/AN = American Indian/Alaska Native; COPD = chronic obstructive pulmonary disease; IHD = ischemic heart disease; IVUS = intravascular ultrasound; NSTEMI = non-ST-elevation myocardial infarction; OCT = optical coherence tomography; SD = standard deviation; STEMI = ST-elevation myocardial infarction

Table S3. Procedural characteristics and outcomes of hospitalizations in which PCI with stent was performed for myocardial infarction from 2008 to 2019

|                                                       | 2008               | 2009               | 2010               | 2011               | 2012               | 2013               | 2014               | 2015 <sup>a</sup>  | 2016                | 2017                 | 2018                 | 2019                 | P-trend |
|-------------------------------------------------------|--------------------|--------------------|--------------------|--------------------|--------------------|--------------------|--------------------|--------------------|---------------------|----------------------|----------------------|----------------------|---------|
| <b>N (sample)</b>                                     | 38,752             | 40,207             | 40,284             | 45,142             | 47,326             | 47,748             | 48,943             | 50,972             | 53,827              | 55,780               | 56,811               | 58,371               | <.001   |
| <b>N (weighted)</b>                                   | 181,629            | 195,428            | 196,565            | 209,234            | 236,630            | 238,740            | 244,715            | 254,860            | 269,135             | 278,900              | 284,055              | 291,855              | <.001   |
| <b>Intravascular imaging (%)</b>                      |                    |                    |                    |                    |                    |                    |                    |                    |                     |                      |                      |                      |         |
| IVUS                                                  | 3.4                | 4.4                | 3.7                | 5.2                | 5.4                | 5.1                | 5.3                | 4.9                | 5.4                 | 5.9                  | 6.8                  | 8.7                  | <.001   |
| OCT                                                   | 0.0                | 0.0                | 0.0                | 0.1                | 0.2                | 0.2                | 0.2                | 0.2                | 0.3                 | 0.3                  | 0.3                  | 0.6                  | <.001   |
| <b>Stent type (%)</b>                                 |                    |                    |                    |                    |                    |                    |                    |                    |                     |                      |                      |                      |         |
| Drug-eluting stent (%)                                | 56.9               | 67.5               | 66.0               | 68.1               | 72.9               | 77.4               | 81.5               | 84.6               | 88.5                | 92.0                 | 94.9                 | 96.3                 | <.001   |
| Bare metal stent (%)                                  | 46.5               | 34.8               | 35.7               | 33.8               | 28.4               | 23.8               | 19.7               | 16.7               | 12.6                | 8.9                  | 5.7                  | 4.1                  | <.001   |
| <b>Procedures (%)</b>                                 |                    |                    |                    |                    |                    |                    |                    |                    |                     |                      |                      |                      |         |
| Mechanical thrombectomy                               | 0.2                | 0.2                | 0.1                | 1.2                | 3.5                | 3.2                | 3.3                | 4.7                | 9.2                 | 9.4                  | 9.3                  | 9.5                  | <.001   |
| IABP                                                  | 6.1                | 6.0                | 5.4                | 5.4                | 4.9                | 4.4                | 4.2                | 4.3                | 4.0                 | 4.0                  | 3.6                  | 3.5                  | <.001   |
| ECMO                                                  | 0.0                | 0.0                | 0.0                | 0.0                | 0.0                | 0.1                | 0.1                | 0.1                | 0.1                 | 0.2                  | 0.2                  | 0.2                  | <.001   |
| Percutaneous LVAD                                     | 0.1                | 0.2                | 0.2                | 0.3                | 0.5                | 0.6                | 0.7                | 1.0                | 1.5                 | 2.0                  | 2.6                  | 2.8                  | <.001   |
| Durable LVAD                                          | 0.0                | 0.0                | 0.0                | 0.0                | 0.0                | 0.0                | 0.0                | 0.0                | 0.0                 | 0.0                  | 0.0                  | 0.0                  | 0.697   |
| RRT                                                   | 1.4                | 1.7                | 1.8                | 2.0                | 1.8                | 2.0                | 2.1                | 2.3                | 2.4                 | 2.7                  | 2.6                  | 2.7                  | <.001   |
| Mechanical ventilation                                | 4.4                | 4.5                | 4.5                | 5.1                | 4.8                | 4.9                | 5.1                | 5.4                | 5.6                 | 5.8                  | 5.6                  | 5.6                  | <.001   |
| <b>Outcomes</b>                                       |                    |                    |                    |                    |                    |                    |                    |                    |                     |                      |                      |                      |         |
| In-hospital mortality (%)                             | 2.7                | 2.6                | 2.4                | 2.6                | 2.5                | 2.6                | 2.6                | 2.7                | 2.8                 | 3.0                  | 2.9                  | 3.1                  | <.001   |
| Length of stay, days, mean (SD)                       | 3.9<br>(4.0)       | 3.9<br>(4.1)       | 3.9<br>(3.9)       | 3.8<br>(4.2)       | 3.7<br>(4.0)       | 3.7<br>(4.2)       | 3.6<br>(3.8)       | 3.6<br>(4.2)       | 3.6<br>(4.3)        | 3.6<br>(4.3)         | 3.6<br>(4.0)         | 3.6<br>(4.2)         | <.001   |
| Total hospital charge, \$, mean (SD)                  | 70,544<br>(55,921) | 73,149<br>(61,418) | 78,294<br>(62,598) | 82,403<br>(64,717) | 82,426<br>(68,554) | 89,218<br>(73,429) | 92,089<br>(71,371) | 97,164<br>(83,424) | 102,914<br>(92,874) | 108,195<br>(100,277) | 113,308<br>(112,291) | 118,909<br>(117,515) | <.001   |
| Total hospital cost, \$, mean (SD)                    | 21,161<br>(13,846) | 20,784<br>(14,302) | 21,630<br>(14,565) | 21,945<br>(15,685) | 21,933<br>(15,716) | 22,828<br>(15,963) | 22,755<br>(14,908) | 23,506<br>(17,047) | 24,434<br>(19,638)  | 24,939<br>(19,738)   | 25,404<br>(20,759)   | 26,786<br>(22,654)   | <.001   |
| Inflation-adjusted total hospital cost, \$, mean (SD) | 23,264<br>(15,223) | 22,935<br>(15,782) | 23,475<br>(15,808) | 23,097<br>(16,508) | 22,611<br>(16,202) | 23,158<br>(16,036) | 22,755<br>(14,908) | 23,476<br>(17,025) | 24,098<br>(19,368)  | 24,084<br>(19,062)   | 23,947<br>(19,568)   | 24,796<br>(20,971)   | <.001   |
| Cardiogenic shock (%)                                 | 5.2                | 5.5                | 5.6                | 5.9                | 5.6                | 5.7                | 6.1                | 6.4                | 6.6                 | 6.7                  | 6.8                  | 7.0                  | <.001   |

<sup>a</sup>ICD-9-CM/PCS codes changed to ICD-10-CM/PCS codes beginning October 2015

Abbreviations: ECMO = extracorporeal membranous oxygenation; IABP = intra-aortic balloon pump; IVUS = intravascular ultrasound; LVAD = left ventricular assist device; OCT = optical coherence tomography; RRT = renal replacement therapy; SD = standard deviation

Table S4. Trend of in-hospital mortality rate after PCI for myocardial infarction from 2008 to 2019

|                                                    | 2008 | 2009 | 2010 | 2011 | 2012 | 2013 | 2014 | 2015 | 2016 | 2017 | 2018 | 2019 | P-trend |
|----------------------------------------------------|------|------|------|------|------|------|------|------|------|------|------|------|---------|
| <b>Crude in-hospital mortality rate (%)</b>        | 2.7  | 2.6  | 2.4  | 2.6  | 2.5  | 2.6  | 2.6  | 2.7  | 2.8  | 3.0  | 2.9  | 3.1  | <.001   |
| <b>Age-adjusted in-hospital mortality rate (%)</b> | 1.6  | 1.7  | 1.7  | 1.7  | 1.8  | 1.7  | 1.7  | 1.6  | 1.8  | 1.9  | 1.8  | 1.9  | <.001   |

Table S5. Baseline characteristics of hospitalizations in which IVUS-assisted PCI with stent was performed for myocardial infarction from 2008 to 2019

|                                  | 2008           | 2009           | 2010           | 2011           | 2012           | 2013           | 2014           | 2015           | 2016           | 2017           | 2018           | 2019           | P-trend |
|----------------------------------|----------------|----------------|----------------|----------------|----------------|----------------|----------------|----------------|----------------|----------------|----------------|----------------|---------|
| <b>N (sample)</b>                | 1,334          | 1,784          | 1,514          | 2,359          | 2,544          | 2,437          | 2,580          | 2,515          | 2,902          | 3,288          | 3,863          | 5,066          | <.001   |
| <b>N (weighted)</b>              | 6,180          | 8,612          | 7,327          | 10,896         | 12,720         | 12,185         | 12,900         | 12,575         | 14,510         | 16,440         | 19,315         | 25,330         | <.001   |
| <b>Intravascular imaging (%)</b> |                |                |                |                |                |                |                |                |                |                |                |                |         |
| IVUS                             | 100            | 100            | 100            | 100            | 100            | 100            | 100            | 100            | 100            | 100            | 100            | 100            | 1.000   |
| OCT                              | 0.0            | 0.0            | 0.0            | 0.0            | 0.3            | 0.1            | 0.3            | 0.2            | 0.4            | 0.6            | 0.5            | 0.9            | <.001   |
| <b>Sex (%)</b>                   |                |                |                |                |                |                |                |                |                |                |                |                |         |
| Male                             | 68.9           | 68.3           | 68.4           | 67.9           | 69.0           | 68.8           | 68.7           | 68.5           | 68.9           | 69.1           | 67.7           | 68.4           | 0.834   |
| Female                           | 31.1           | 31.7           | 31.6           | 32.1           | 31.0           | 31.2           | 31.3           | 31.5           | 31.2           | 30.9           | 32.3           | 31.6           | 0.834   |
| <b>Age</b>                       |                |                |                |                |                |                |                |                |                |                |                |                |         |
| Mean (SD)                        | 62.5<br>(13.0) | 62.7<br>(13.3) | 62.3<br>(12.9) | 63.0<br>(13.3) | 63.0<br>(12.8) | 63.3<br>(12.9) | 62.9<br>(13.1) | 63.8<br>(13.0) | 63.8<br>(12.9) | 63.7<br>(12.7) | 64.4<br>(12.7) | 64.5<br>(12.8) | <.001   |
| <65 (%)                          | 55.6           | 56.7           | 58.3           | 55.7           | 54.7           | 62.8           | 54.2           | 52.2           | 52.5           | 52.2           | 49.1           | 49.9           | <.001   |
| 65-74 (%)                        | 24.4           | 22.0           | 22.6           | 22.4           | 25.1           | 26.0           | 25.7           | 26.1           | 25.1           | 27.0           | 27.6           | 27.2           | <.001   |
| 75-84 (%)                        | 15.8           | 16.4           | 14.3           | 16.7           | 15.5           | 15.6           | 14.7           | 15.4           | 17.6           | 15.2           | 17.3           | 16.7           | 0.052   |
| ≥85 (%)                          | 4.3            | 4.9            | 4.9            | 5.3            | 4.7            | 5.7            | 5.4            | 6.3            | 4.9            | 5.5            | 6.0            | 6.3            | <.001   |
| <b>Race (%)</b>                  |                |                |                |                |                |                |                |                |                |                |                |                |         |
| White                            | 78.4           | 80.3           | 76.0           | 73.0           | 79.0           | 77.2           | 76.0           | 76.6           | 77.7           | 74.8           | 75.3           | 75.5           | <.001   |
| Black                            | 7.1            | 6.3            | 8.7            | 8.8            | 8.1            | 8.0            | 9.4            | 9.1            | 7.7            | 9.7            | 9.3            | 8.3            | 0.008   |
| Hispanic                         | 6.0            | 7.7            | 9.3            | 9.4            | 6.7            | 7.7            | 7.6            | 7.0            | 7.3            | 8.1            | 8.0            | 8.6            | 0.200   |
| Asian                            | 2.3            | 2.0            | 2.2            | 2.2            | 1.6            | 2.2            | 2.6            | 2.8            | 2.7            | 2.9            | 3.3            | 3.2            | <.001   |
| AI/AN                            | 0.9            | 0.7            | 0.9            | 0.6            | 0.5            | 0.5            | 0.5            | 0.6            | 0.7            | 0.9            | 1.0            | 1.0            | 0.020   |
| Other                            | 5.3            | 3.0            | 2.9            | 6.0            | 4.2            | 4.3            | 4.0            | 3.9            | 3.8            | 3.6            | 3.3            | 3.4            | <.001   |
| <b>Comorbidities (%)</b>         |                |                |                |                |                |                |                |                |                |                |                |                |         |
| Smoking                          | 41.4           | 44.8           | 44.2           | 43.5           | 48.0           | 48.7           | 50.9           | 51.4           | 53.2           | 53.2           | 53.2           | 51.2           | <.001   |
| Hypertension                     | 60.9           | 57.5           | 58.4           | 57.7           | 58.9           | 60.3           | 60.7           | 60.6           | 58.1           | 46.6           | 44.4           | 42.4           | <.001   |
| Diabetes mellitus                | 26.2           | 27.9           | 31.5           | 33.3           | 32.6           | 34.6           | 33.8           | 34.0           | 36.4           | 37.3           | 37.3           | 36.5           | <.001   |
| Hyperlipidemia                   | 69.3           | 70.0           | 69.8           | 71.9           | 70.9           | 73.3           | 72.7           | 70.0           | 72.9           | 71.0           | 70.7           | 73.4           | 0.011   |
| Obesity                          | 13.0           | 14.0           | 12.8           | 15.0           | 17.3           | 17.8           | 17.6           | 18.6           | 18.5           | 20.4           | 22.3           | 21.8           | <.001   |
| Heart failure                    | 14.6           | 17.9           | 18.6           | 19.4           | 20.0           | 21.2           | 21.5           | 23.0           | 27.2           | 28.1           | 29.4           | 32.1           | <.001   |
| Chronic IHD                      | 94.8           | 94.2           | 93.6           | 93.4           | 94.1           | 93.8           | 92.8           | 93.9           | 92.9           | 92.5           | 91.9           | 92.2           | <.001   |
| Atrial fibrillation              | 10.9           | 9.5            | 9.3            | 11.1           | 12.3           | 11.5           | 12.4           | 13.4           | 14.3           | 13.1           | 14.6           | 13.3           | <.001   |
| Valvular heart disease           | 5.3            | 5.8            | 7.0            | 5.8            | 6.5            | 6.4            | 7.8            | 8.2            | 8.1            | 7.9            | 7.6            | 7.8            | <.001   |
| PAD                              | 7.3            | 7.6            | 6.8            | 7.9            | 8.0            | 7.9            | 8.1            | 7.6            | 8.6            | 6.8            | 6.1            | 6.4            | 0.004   |
| Previous stroke                  | 4.4            | 5.3            | 5.4            | 6.6            | 5.6            | 6.3            | 7.5            | 7.4            | 7.6            | 8.0            | 8.0            | 8.0            | <.001   |
| Previous CABG                    | 3.2            | 4.5            | 2.8            | 4.5            | 4.2            | 3.8            | 4.8            | 4.3            | 6.1            | 5.8            | 6.1            | 5.9            | <.001   |
| Previous pacemaker               | 1.7            | 1.5            | 1.9            | 1.6            | 1.5            | 1.7            | 1.4            | 2.1            | 2.5            | 2.0            | 1.9            | 2.1            | 0.020   |
| Chronic pulmonary disease        | 16.1           | 15.1           | 15.1           | 15.3           | 18.5           | 17.8           | 17.5           | 17.9           | 18.7           | 17.5           | 18.1           | 17.6           | <.001   |
| Pulmonary hypertension           | 1.6            | 2.3            | 2.4            | 3.8            | 3.0            | 3.8            | 3.2            | 3.0            | 4.5            | 5.0            | 4.3            | 4.0            | <.001   |
| Chronic kidney disease           | 9.4            | 10.8           | 13.1           | 13.0           | 13.4           | 14.4           | 14.7           | 15.8           | 17.6           | 17.5           | 18.3           | 19.5           | <.001   |
| End-stage renal disease          | 1.7            | 2.1            | 2.9            | 2.3            | 2.3            | 2.6            | 3.1            | 2.8            | 3.5            | 2.8            | 3.8            | 3.6            | <.001   |

|                                  |      |      |      |      |      |      |      |      |      |      |      |      |       |
|----------------------------------|------|------|------|------|------|------|------|------|------|------|------|------|-------|
| Liver cirrhosis                  | 0.4  | 0.3  | 0.3  | 0.5  | 0.4  | 0.7  | 0.7  | 0.8  | 0.8  | 0.8  | 0.9  | 0.9  | <.001 |
| History of malignancy            | 6.2  | 5.6  | 6.4  | 5.9  | 7.4  | 8.1  | 7.4  | 8.8  | 7.5  | 8.6  | 8.3  | 8.6  | <.001 |
| Deficiency anemia                | 2.1  | 2.8  | 3.0  | 2.5  | 1.8  | 2.2  | 2.1  | 2.3  | 3.1  | 2.7  | 3.1  | 2.6  | 0.101 |
| Malnutrition                     | 1.1  | 1.1  | 0.9  | 0.4  | 0.9  | 0.9  | 1.0  | 1.2  | 1.2  | 1.7  | 1.6  | 2.0  | <.001 |
| Dementia                         | 1.1  | 2.1  | 1.9  | 2.2  | 2.0  | 2.0  | 1.8  | 2.4  | 1.9  | 1.9  | 2.2  | 2.8  | 0.005 |
| Major depression                 | 0.5  | 0.3  | 0.2  | 0.6  | 0.7  | 0.8  | 0.7  | 0.5  | 0.1  | 0.6  | 0.4  | 0.6  | 0.880 |
| <b>Hospital characteristics</b>  |      |      |      |      |      |      |      |      |      |      |      |      |       |
| <b>Hospital region (%)</b>       |      |      |      |      |      |      |      |      |      |      |      |      |       |
| Northwest                        | 13.0 | 22.5 | 11.3 | 16.5 | 13.9 | 12.9 | 14.3 | 13.5 | 14.4 | 14.6 | 14.6 | 16.3 | 0.608 |
| Midwest                          | 16.9 | 10.1 | 16.4 | 16.8 | 20.1 | 21.5 | 19.1 | 21.2 | 22.1 | 22.8 | 21.5 | 24.0 | <.001 |
| South                            | 38.2 | 38.6 | 30.6 | 31.7 | 37.9 | 39.3 | 38.6 | 38.1 | 37.2 | 36.6 | 37.5 | 31.5 | <.001 |
| West                             | 31.9 | 28.8 | 41.7 | 35.0 | 28.2 | 26.4 | 28.0 | 27.3 | 26.4 | 26.0 | 26.4 | 28.2 | 0.017 |
| <b>Hospital bed size (%)</b>     |      |      |      |      |      |      |      |      |      |      |      |      |       |
| Small                            | 5.3  | 4.3  | 6.3  | 9.6  | 8.5  | 7.6  | 13.9 | 13.4 | 12.7 | 14.8 | 14.0 | 14.2 | <.001 |
| Medium                           | 33.2 | 21.7 | 15.4 | 22.2 | 22.6 | 23.9 | 26.7 | 25.1 | 23.0 | 25.3 | 24.7 | 24.1 | 0.105 |
| Large                            | 61.5 | 64.1 | 78.3 | 68.2 | 68.9 | 68.5 | 59.5 | 61.5 | 64.3 | 59.9 | 61.3 | 61.7 | <.001 |
| <b>Urban location (%)</b>        |      |      |      |      |      |      |      |      |      |      |      |      |       |
| Rural                            | 4.2  | 5.4  | 9.4  | 2.7  | 7.5  | 7.9  | 6.0  | 5.3  | 6.7  | 6.6  | 6.3  | 5.7  | 0.404 |
| Urban non-teaching               | 42.7 | 38.5 | 49.6 | 42.6 | 53.6 | 42.0 | 28.5 | 27.7 | 26.6 | 20.1 | 19.4 | 17.3 | <.001 |
| Urban teaching                   | 53.2 | 56.1 | 41.0 | 54.7 | 48.9 | 50.1 | 65.5 | 67.1 | 66.8 | 73.3 | 74.3 | 77.0 | <.001 |
| <b>Primary payer (%)</b>         |      |      |      |      |      |      |      |      |      |      |      |      |       |
| Medicare                         | 43.5 | 42.2 | 41.1 | 43.7 | 46.2 | 48.0 | 46.1 | 46.4 | 48.5 | 48.3 | 49.8 | 49.9 | <.001 |
| Medicaid                         | 4.8  | 7.7  | 7.6  | 8.2  | 6.5  | 6.3  | 9.7  | 10.0 | 9.8  | 9.8  | 9.7  | 9.3  | <.001 |
| Private insurance                | 41.3 | 39.8 | 38.5 | 36.3 | 36.4 | 33.2 | 35.3 | 35.0 | 33.3 | 33.5 | 32.2 | 31.6 | <.001 |
| Self-pay                         | 6.5  | 7.4  | 8.1  | 8.2  | 7.8  | 8.4  | 6.2  | 5.3  | 5.6  | 4.9  | 4.7  | 5.5  | <.001 |
| No charge                        | 1.0  | 0.3  | 0.7  | 0.6  | 0.4  | 0.8  | 0.4  | 0.4  | 0.2  | 0.3  | 0.2  | 0.4  | <.001 |
| Others                           | 3.0  | 2.6  | 4.0  | 3.0  | 2.8  | 3.3  | 2.3  | 2.9  | 2.6  | 3.2  | 3.3  | 3.5  | 0.216 |
| <b>Median income (%)</b>         |      |      |      |      |      |      |      |      |      |      |      |      |       |
| Quartile 1                       | 26.2 | 20.0 | 23.5 | 25.3 | 38.0 | 28.7 | 27.6 | 27.9 | 29.2 | 27.5 | 27.3 | 25.7 | <.001 |
| Quartile 2                       | 26.4 | 24.5 | 25.5 | 23.0 | 25.4 | 25.9 | 26.4 | 24.3 | 24.6 | 27.2 | 25.5 | 25.4 | 0.276 |
| Quartile 3                       | 21.0 | 30.4 | 26.0 | 25.9 | 23.7 | 23.7 | 24.7 | 26.8 | 26.4 | 24.5 | 25.6 | 26.1 | 0.591 |
| Quartile 4                       | 26.4 | 25.2 | 25.0 | 25.8 | 22.9 | 21.7 | 21.4 | 21.0 | 19.9 | 20.8 | 21.6 | 22.8 | <.001 |
| <b>Clinical presentation (%)</b> |      |      |      |      |      |      |      |      |      |      |      |      |       |
| STEMI (%)                        | 43.9 | 43.2 | 44.5 | 44.5 | 40.9 | 41.5 | 40.6 | 41.3 | 40.5 | 40.7 | 40.5 | 40.9 | <.001 |
| NSTEMI (%)                       | 56.1 | 56.8 | 55.5 | 55.5 | 59.1 | 58.5 | 59.4 | 58.7 | 59.5 | 59.3 | 59.5 | 59.1 | <.001 |

Abbreviations: AI/AN = American Indian/Alaska Native; COPD = chronic obstructive pulmonary disease; IHD = ischemic heart disease; IVUS = intravascular ultrasound; NSTEMI = non-ST-elevation myocardial infarction; OCT = optical coherence tomography; SD = standard deviation; STEMI = ST-elevation myocardial infarction

Table S6. Baseline characteristics of hospitalizations in which OCT-assisted PCI with stent was performed for myocardial infarction from 2008 to 2019

|                                  | 2008 | 2009 | 2010 | 2011           | 2012           | 2013           | 2014           | 2015           | 2016           | 2017           | 2018           | 2019           | P-trend |
|----------------------------------|------|------|------|----------------|----------------|----------------|----------------|----------------|----------------|----------------|----------------|----------------|---------|
| <b>N (sample)</b>                | -    | -    | -    | 53             | 84             | 105            | 104            | 114            | 148            | 157            | 168            | 319            | <.001   |
| <b>N (weighted)</b>              | -    | -    | -    | 246            | 420            | 525            | 520            | 570            | 740            | 785            | 840            | 1,595          | <.001   |
| <b>Intravascular imaging (%)</b> |      |      |      |                |                |                |                |                |                |                |                |                |         |
| IVUS                             | -    | -    | -    | 0.0            | 8.3            | 1.9            | 7.7            | 5.3            | 7.4            | 12.1           | 10.7           | 13.8           | <.001   |
| OCT                              | -    | -    | -    | 100            | 100            | 100            | 100            | 100            | 100            | 100            | 100            | 100            | 1.000   |
| <b>Sex (%)</b>                   |      |      |      |                |                |                |                |                |                |                |                |                |         |
| Male                             | -    | -    | -    | 56.6           | 73.8           | 68.5           | 71.2           | 71.1           | 70.3           | 71.3           | 63.7           | 69.0           | 0.881   |
| Female                           | -    | -    | -    | 43.3           | 26.2           | 31.5           | 28.9           | 29.0           | 29.7           | 28.7           | 36.3           | 31.0           | 0.881   |
| <b>Age</b>                       |      |      |      |                |                |                |                |                |                |                |                |                |         |
| Mean (SD)                        | -    | -    | -    | 61.9<br>(12.4) | 60.1<br>(12.6) | 59.9<br>(12.0) | 63.1<br>(13.4) | 59.5<br>(13.2) | 62.7<br>(13.0) | 61.2<br>(12.4) | 64.1<br>(14.3) | 63.6<br>(13.7) | 0.003   |
| <65 (%)                          | -    | -    | -    | 56.6           | 69.1           | 68.5           | 54.8           | 4.9            | 54.7           | 61.8           | 46.4           | 51.7           | <.001   |
| 65-74 (%)                        | -    | -    | -    | 28.3           | 16.7           | 17.6           | 24.0           | 21.1           | 27.7           | 20.4           | 28.6           | 25.4           | 0.121   |
| 75-84 (%)                        | -    | -    | -    | 15.1           | 7.1            | 10.2           | 15.4           | 10.5           | 12.8           | 15.3           | 17.3           | 16.3           | 0.017   |
| ≥85 (%)                          | -    | -    | -    | 0.0            | 7.1            | 3.7            | 5.8            | 3.5            | 4.7            | 2.6            | 7.7            | 6.6            | 0.126   |
| <b>Race (%)</b>                  |      |      |      |                |                |                |                |                |                |                |                |                |         |
| White                            | -    | -    | -    | 71.7           | 78.6           | 79.6           | 79.8           | 82.5           | 78.4           | 73.9           | 72.6           | 71.2           | 0.025   |
| Black                            | -    | -    | -    | 20.8           | 15.5           | 7.4            | 11.5           | 7.9            | 10.1           | 7.6            | 10.1           | 11.0           | 0.193   |
| Hispanic                         | -    | -    | -    | 1.9            | 1.2            | 6.5            | 5.8            | 5.3            | 4.7            | 7.6            | 8.9            | 9.1            | 0.002   |
| Asian                            | -    | -    | -    | 3.8            | 1.2            | 4.6            | 1.0            | 1.8            | 2.7            | 4.5            | 1.8            | 4.1            | 0.407   |
| AI/AN                            | -    | -    | -    | 0.0            | 0.0            | 0.0            | 1.0            | 0.0            | 1.4            | 1.9            | 0.6            | 0.6            | 0.317   |
| Other                            | -    | -    | -    | 1.9            | 3.6            | 1.9            | 1.0            | 2.6            | 2.7            | 4.5            | 6.0            | 4.1            | 0.061   |
| <b>Comorbidities (%)</b>         |      |      |      |                |                |                |                |                |                |                |                |                |         |
| Smoking                          | -    | -    | -    | 41.5           | 50.0           | 53.7           | 55.8           | 46.5           | 54.7           | 52.9           | 54.2           | 54.9           | 0.153   |
| Hypertension                     | -    | -    | -    | 62.3           | 69.1           | 61.1           | 64.4           | 57.0           | 57.4           | 54.8           | 50.6           | 48.6           | <.001   |
| Diabetes mellitus                | -    | -    | -    | 37.7           | 33.3           | 27.8           | 27.9           | 31.6           | 31.1           | 28.0           | 33.9           | 29.2           | 0.611   |
| Hyperlipidemia                   | -    | -    | -    | 73.6           | 69.1           | 70.4           | 81.7           | 77.2           | 71.0           | 70.7           | 73.2           | 68.7           | 0.249   |
| Obesity                          | -    | -    | -    | 11.3           | 22.6           | 15.7           | 14.4           | 21.1           | 23.0           | 15.9           | 14.9           | 17.9           | 0.939   |
| Heart failure                    | -    | -    | -    | 22.6           | 11.9           | 15.7           | 20.2           | 21.9           | 14.9           | 17.2           | 23.2           | 26.7           | 0.005   |
| Chronic IHD                      | -    | -    | -    | 96.2           | 91.7           | 95.4           | 91.4           | 95.6           | 95.3           | 93.6           | 93.5           | 92.8           | 0.589   |
| Atrial fibrillation              | -    | -    | -    | 5.7            | 8.3            | 8.3            | 13.5           | 10.5           | 10.1           | 10.2           | 14.9           | 13.8           | 0.025   |
| Valvular heart disease           | -    | -    | -    | 9.4            | 8.3            | 4.6            | 6.7            | 8.8            | 10.8           | 9.6            | 7.7            | 5.0            | 0.497   |
| PAD                              | -    | -    | -    | 9.4            | 4.8            | 8.3            | 5.8            | 7.0            | 8.1            | 6.4            | 3.0            | 5.3            | 0.157   |
| Previous stroke                  | -    | -    | -    | 7.6            | 6.0            | 6.5            | 11.5           | 5.3            | 6.8            | 8.3            | 9.5            | 7.8            | 0.601   |
| Previous CABG                    | -    | -    | -    | 7.6            | 3.6            | 4.6            | 0.0            | 4.4            | 4.1            | 7.6            | 4.2            | 3.8            | 0.962   |
| Previous pacemaker               | -    | -    | -    | 1.9            | 2.4            | 0.9            | 1.0            | 0.0            | 0.7            | 0.0            | 3.6            | 1.9            | 0.395   |
| Chronic pulmonary disease        | -    | -    | -    | 9.4            | 16.7           | 18.5           | 15.4           | 7.9            | 16.2           | 18.5           | 18.5           | 11.9           | 0.945   |
| Pulmonary hypertension           | -    | -    | -    | 0.0            | 0.0            | 4.6            | 2.9            | 0.9            | 2.7            | 3.2            | 5.4            | 3.1            | 0.059   |
| Chronic kidney disease           | -    | -    | -    | 7.6            | 6.0            | 9.3            | 7.7            | 11.4           | 14.9           | 7.0            | 14.9           | 13.5           | 0.016   |
| End-stage renal disease          | -    | -    | -    | 5.7            | 1.2            | 2.8            | 3.9            | 7.0            | 2.0            | 1.9            | 4.2            | 2.8            | 0.659   |



|                                  |   |   |   |      |      |      |      |      |      |      |      |      |       |
|----------------------------------|---|---|---|------|------|------|------|------|------|------|------|------|-------|
| Liver cirrhosis                  | - | - | - | 0.0  | 0.0  | 0.0  | 2.9  | 0.0  | 0.7  | 0.0  | 0.6  | 0.3  | 0.741 |
| History of malignancy            | - | - | - | 7.6  | 7.1  | 7.4  | 7.7  | 12.3 | 9.5  | 8.9  | 13.7 | 8.9  | 0.319 |
| Deficiency anemia                | - | - | - | 3.8  | 1.2  | 0.0  | 3.9  | 0.9  | 3.4  | 2.6  | 6.0  | 4.1  | 0.033 |
| Malnutrition                     | - | - | - | 0.0  | 0.0  | 0.9  | 1.0  | 0.9  | 2.0  | 0.6  | 1.2  | 0.6  | 0.704 |
| Dementia                         | - | - | - | 1.9  | 0.0  | 1.9  | 1.9  | 0.9  | 0.7  | 0.6  | 2.4  | 1.9  | 0.450 |
| Major depression                 | - | - | - | 0.0  | 0.0  | 0.0  | 0.0  | 1.8  | 0.0  | 0.6  | 0.6  | 0.6  | 0.327 |
| <b>Hospital characteristics</b>  |   |   |   |      |      |      |      |      |      |      |      |      |       |
| <b>Hospital region (%)</b>       |   |   |   |      |      |      |      |      |      |      |      |      |       |
| Northwest                        | - | - | - | 11.3 | 14.3 | 17.6 | 21.2 | 29.0 | 32.4 | 35.7 | 38.1 | 42.3 | <.001 |
| Midwest                          | - | - | - | 3.8  | 22.6 | 27.8 | 16.4 | 20.2 | 21.0 | 12.1 | 11.3 | 10.3 | <.001 |
| South                            | - | - | - | 84.9 | 41.7 | 34.3 | 41.4 | 32.5 | 29.7 | 32.5 | 35.7 | 29.8 | <.001 |
| West                             | - | - | - | 0.0  | 21.4 | 20.4 | 21.2 | 18.4 | 16.9 | 19.8 | 14.9 | 17.6 | 0.585 |
| <b>Hospital bed size (%)</b>     |   |   |   |      |      |      |      |      |      |      |      |      |       |
| Small                            | - | - | - | 0.0  | 6.0  | 1.9  | 6.7  | 14.9 | 10.1 | 9.6  | 3.0  | 4.7  | 0.974 |
| Medium                           | - | - | - | 11.3 | 7.1  | 21.3 | 32.7 | 36.8 | 43.2 | 44.6 | 40.5 | 31.0 | <.001 |
| Large                            | - | - | - | 88.7 | 86.9 | 76.9 | 60.6 | 48.3 | 46.6 | 45.9 | 56.6 | 64.3 | <.001 |
| <b>Urban location (%)</b>        |   |   |   |      |      |      |      |      |      |      |      |      |       |
| Rural                            | - | - | - | 1.9  | 3.6  | 3.7  | 5.8  | 3.5  | 6.1  | 2.6  | 2.4  | 4.1  | 0.900 |
| Urban non-teaching               | - | - | - | 0.0  | 29.8 | 30.6 | 19.2 | 19.3 | 14.2 | 15.3 | 11.3 | 7.5  | <.001 |
| Urban teaching                   | - | - | - | 98.1 | 66.7 | 65.7 | 75.0 | 77.2 | 79.7 | 82.2 | 86.3 | 88.4 | <.001 |
| <b>Primary payer (%)</b>         |   |   |   |      |      |      |      |      |      |      |      |      |       |
| Medicare                         | - | - | - | 41.5 | 39.3 | 37.0 | 45.2 | 37.7 | 39.2 | 38.2 | 51.2 | 47.0 | 0.030 |
| Medicaid                         | - | - | - | 3.8  | 8.3  | 9.3  | 14.4 | 11.4 | 12.2 | 12.1 | 10.7 | 10.0 | 0.452 |
| Private insurance                | - | - | - | 37.7 | 39.3 | 39.8 | 28.9 | 42.1 | 41.9 | 40.1 | 32.7 | 35.4 | 0.441 |
| Self-pay                         | - | - | - | 15.1 | 9.5  | 10.2 | 8.7  | 4.4  | 3.4  | 5.7  | 2.4  | 3.8  | <.001 |
| No charge                        | - | - | - | 0.0  | 0.0  | 0.0  | 0.0  | 0.0  | 0.0  | 0.0  | 0.6  | 0.3  | 0.187 |
| Others                           | - | - | - | 1.9  | 3.6  | 3.7  | 2.9  | 4.4  | 3.4  | 3.8  | 2.4  | 3.5  | 0.994 |
| <b>Median income (%)</b>         |   |   |   |      |      |      |      |      |      |      |      |      |       |
| Quartile 1                       | - | - | - | 35.9 | 34.5 | 25.7 | 37.5 | 17.5 | 25.7 | 23.6 | 19.6 | 25.7 | 0.013 |
| Quartile 2                       | - | - | - | 24.5 | 20.2 | 27.6 | 22.1 | 26.3 | 23.7 | 25.5 | 22.6 | 22.3 | 0.648 |
| Quartile 3                       | - | - | - | 3.2  | 26.2 | 21.9 | 17.3 | 21.9 | 23.0 | 19.8 | 23.8 | 21.0 | 0.372 |
| Quartile 4                       | - | - | - | 9.4  | 19.1 | 24.8 | 23.1 | 34.2 | 27.7 | 31.2 | 33.9 | 31.0 | <.001 |
| <b>Clinical presentation (%)</b> |   |   |   |      |      |      |      |      |      |      |      |      |       |
| STEMI (%)                        | - | - | - | 47.2 | 47.2 | 44.4 | 37.5 | 38.6 | 37.8 | 40.1 | 39.3 | 37.9 | <.001 |
| NSTEMI (%)                       | - | - | - | 52.8 | 52.8 | 55.6 | 62.5 | 61.4 | 62.2 | 59.9 | 60.7 | 62.1 | <.001 |

Abbreviations: AI/AN = American Indian/Alaska Native; COPD = chronic obstructive pulmonary disease; IHD = ischemic heart disease; IVUS = intravascular ultrasound; NSTEMI = non-ST-elevation myocardial infarction; OCT = optical coherence tomography; SD = standard deviation; STEMI = ST-elevation myocardial infarction

Table S7. Procedural characteristics and outcomes of hospitalizations in which IVUS-assisted PCI was performed for myocardial infarction from 2008 to 2019

|                                                       | 2008               | 2009               | 2010               | 2011               | 2012               | 2013                | 2014                | 2015                | 2016                 | 2017                 | 2018                 | 2019                 | P-trend |
|-------------------------------------------------------|--------------------|--------------------|--------------------|--------------------|--------------------|---------------------|---------------------|---------------------|----------------------|----------------------|----------------------|----------------------|---------|
| <b>N (sample)</b>                                     | 1,334              | 1,784              | 1,514              | 2,359              | 2,544              | 2,437               | 2,580               | 2,515               | 2,902                | 3,288                | 3,863                | 5,066                | <.001   |
| <b>N (weighted)</b>                                   | 6,180              | 8,612              | 7,327              | 10,896             | 12,720             | 12,185              | 12,900              | 12,575              | 14,510               | 16,440               | 19,315               | 25,330               | <.001   |
| <b>Intravascular imaging (%)</b>                      |                    |                    |                    |                    |                    |                     |                     |                     |                      |                      |                      |                      |         |
| IVUS                                                  | 100                | 100                | 100                | 100                | 100                | 100                 | 100                 | 100                 | 100                  | 100                  | 100                  | 100                  | 1.000   |
| OCT                                                   | 0.0                | 0.0                | 0.0                | 0.0                | 0.3                | 0.1                 | 0.3                 | 0.2                 | 0.4                  | 0.6                  | 0.5                  | 0.9                  | <.001   |
| <b>Stent type (%)</b>                                 |                    |                    |                    |                    |                    |                     |                     |                     |                      |                      |                      |                      |         |
| Drug-eluting stent (%)                                | 63.0               | 74.2               | 74.2               | 74.7               | 78.9               | 80.0                | 84.8                | 87.8                | 90.6                 | 93.8                 | 96.1                 | 98.0                 | <.001   |
| Bare metal stent (%)                                  | 43.9               | 29.1               | 28.3               | 27.6               | 23.0               | 21.6                | 17.1                | 13.8                | 11.0                 | 7.5                  | 4.7                  | 2.4                  | <.001   |
| <b>Procedures (%)</b>                                 |                    |                    |                    |                    |                    |                     |                     |                     |                      |                      |                      |                      |         |
| Mechanical thrombectomy                               | 0.3                | 0.3                | 0.1                | 1.7                | 5.9                | 4.8                 | 5.9                 | 7.6                 | 13.9                 | 15.0                 | 14.3                 | 16.5                 | <.001   |
| IABP                                                  | 5.2                | 4.9                | 6.0                | 5.8                | 5.7                | 4.8                 | 4.7                 | 4.9                 | 4.9                  | 5.3                  | 4.7                  | 4.5                  | 0.019   |
| ECMO                                                  | 0.0                | 0.0                | 0.1                | 0.0                | 0.1                | 0.0                 | 0.1                 | 0.4                 | 0.1                  | 0.3                  | 0.3                  | 0.4                  | <.001   |
| Percutaneous LVAD                                     | 0.2                | 0.3                | 0.7                | 0.4                | 0.9                | 1.1                 | 1.3                 | 2.4                 | 3.7                  | 4.4                  | 5.4                  | 5.5                  | <.001   |
| Durable LVAD                                          | 0.0                | 0.1                | 0.0                | 0.0                | 0.0                | 0.0                 | 0.0                 | 0.0                 | 0.0                  | 0.0                  | 0.0                  | 0.0                  | 0.104   |
| RRT                                                   | 1.7                | 1.9                | 2.7                | 2.1                | 2.2                | 2.2                 | 2.5                 | 2.6                 | 3.3                  | 2.7                  | 3.3                  | 3.0                  | <.001   |
| Mechanical ventilation                                | 1.6                | 3.6                | 4.4                | 4.8                | 3.8                | 4.1                 | 4.3                 | 5.4                 | 5.0                  | 6.5                  | 5.7                  | 5.7                  | <.001   |
| <b>Outcomes</b>                                       |                    |                    |                    |                    |                    |                     |                     |                     |                      |                      |                      |                      |         |
| In-hospital mortality (%)                             | 1.6                | 1.5                | 1.8                | 1.8                | 1.7                | 1.7                 | 1.8                 | 2.2                 | 2.0                  | 2.9                  | 2.3                  | 2.7                  | <.001   |
| Length of stay, days, mean (SD)                       | 4.0<br>(3.9)       | 4.0<br>(4.1)       | 4.1<br>(4.0)       | 3.9<br>(3.8)       | 3.9<br>(4.0)       | 3.8<br>(4.0)        | 3.8<br>(3.8)        | 3.9<br>(4.1)        | 4.1<br>(4.4)         | 4.0<br>(4.4)         | 4.0<br>(4.5)         | 4.0<br>(4.8)         | 0.169   |
| Total hospital charge, \$, mean (SD)                  | 89,003<br>(64,232) | 85,471<br>(65,048) | 96,660<br>(76,813) | 90,944<br>(62,573) | 95,842<br>(70,809) | 104,384<br>(76,756) | 110,725<br>(82,916) | 116,253<br>(88,899) | 127,195<br>(127,796) | 131,380<br>(112,098) | 136,760<br>(128,285) | 142,165<br>(131,796) | <.001   |
| Total hospital cost, \$, mean (SD)                    | 25,595<br>(15,016) | 24,934<br>(14,928) | 26,887<br>(18,363) | 25,692<br>(15,005) | 25,899<br>(16,739) | 27,243<br>(17,251)  | 27,171<br>(17,134)  | 28,623<br>(19,463)  | 31,232<br>(28,279)   | 31,160<br>(23,203)   | 31,697<br>(24,304)   | 32,910<br>(27,446)   | <.001   |
| Inflation-adjusted total hospital cost, \$, mean (SD) | 28,139<br>(16,509) | 27,515<br>(16,473) | 29,180<br>(19,929) | 27,040<br>(15,792) | 26,700<br>(17,256) | 27,665<br>(17,604)  | 27,170<br>(17,134)  | 28,586<br>(19,439)  | 30,802<br>(27,890)   | 30,092<br>(22,407)   | 29,879<br>(22,911)   | 30,465<br>(23,406)   | <.001   |
| Cardiogenic shock (%)                                 | 3.8                | 4.4                | 5.0                | 5.3                | 5.2                | 5.2                 | 5.4                 | 6.7                 | 6.2                  | 7.5                  | 7.4                  | 8.0                  | <.001   |

Abbreviations: ECMO = extracorporeal membranous oxygenation; IABP = intra-aortic balloon pump; IVUS = intravascular ultrasound; LVAD = left ventricular assist device; OCT = optical coherence tomography; RRT = renal replacement therapy; SD = standard deviation

Table S8. Procedural characteristics and outcomes of hospitalizations in which OCT-assisted PCI was performed for myocardial infarction from 2008 to 2019

|                                                       | 2008 | 2009 | 2010 | 2011               | 2012               | 2013               | 2014               | 2015                | 2016                | 2017                | 2018                | 2019                 | P-trend |
|-------------------------------------------------------|------|------|------|--------------------|--------------------|--------------------|--------------------|---------------------|---------------------|---------------------|---------------------|----------------------|---------|
| <b>N (sample)</b>                                     | -    | -    | -    | 53                 | 84                 | 105                | 104                | 114                 | 148                 | 157                 | 168                 | 319                  | <.001   |
| <b>N (weighted)</b>                                   | -    | -    | -    | 246                | 420                | 525                | 520                | 570                 | 740                 | 785                 | 840                 | 1,595                | <.001   |
| <b>Intravascular imaging (%)</b>                      |      |      |      |                    |                    |                    |                    |                     |                     |                     |                     |                      |         |
| IVUS                                                  | -    | -    | -    | 0.0                | 8.3                | 1.9                | 7.7                | 5.3                 | 7.4                 | 12.1                | 10.7                | 13.8                 | <.001   |
| OCT                                                   | -    | -    | -    | 100                | 100                | 100                | 100                | 100                 | 100                 | 100                 | 100                 | 100                  | 1.000   |
| <b>Stent type (%)</b>                                 |      |      |      |                    |                    |                    |                    |                     |                     |                     |                     |                      |         |
| Drug-eluting stent (%)                                | -    | -    | -    | 75.5               | 82.1               | 87.0               | 85.6               | 91.2                | 97.3                | 93.6                | 99.4                | 98.8                 | <.001   |
| Bare metal stent (%)                                  | -    | -    | -    | 26.4               | 17.9               | 13.9               | 20.2               | 10.5                | 4.1                 | 8.9                 | 2.4                 | 1.9                  | <.001   |
| <b>Procedures (%)</b>                                 |      |      |      |                    |                    |                    |                    |                     |                     |                     |                     |                      |         |
| Mechanical thrombectomy                               | -    | -    | -    | 7.6                | 8.3                | 7.4                | 7.7                | 3.5                 | 10.1                | 10.8                | 14.3                | 12.5                 | 0.007   |
| IABP                                                  | -    | -    | -    | 0.0                | 1.2                | 2.8                | 1.9                | 2.6                 | 3.4                 | 4.5                 | 1.8                 | 2.2                  | 0.524   |
| ECMO                                                  | -    | -    | -    | 0.0                | 0.0                | 0.9                | 0.0                | 0.0                 | 0.0                 | 0.0                 | 0.0                 | 0.0                  | 0.204   |
| Percutaneous LVAD                                     | -    | -    | -    | 1.9                | 1.2                | 2.8                | 0.0                | 0.9                 | 1.4                 | 3.8                 | 3.6                 | 1.3                  | 0.567   |
| Durable LVAD                                          | -    | -    | -    | 0.0                | 0.0                | 0.0                | 0.0                | 0.0                 | 0.0                 | 0.0                 | 0.0                 | 0.0                  | <.001   |
| RRT                                                   | -    | -    | -    | 3.8                | 1.2                | 1.9                | 4.8                | 4.4                 | 2.0                 | 1.3                 | 4.2                 | 2.5                  | 0.949   |
| Mechanical ventilation                                | -    | -    | -    | 3.8                | 0.0                | 3.7                | 0.0                | 7.0                 | 4.1                 | 3.2                 | 3.6                 | 2.3                  | 0.794   |
| <b>Outcomes</b>                                       |      |      |      |                    |                    |                    |                    |                     |                     |                     |                     |                      |         |
| In-hospital mortality (%)                             | -    | -    | -    | 0.0                | 1.2                | 0.9                | 0.0                | 1.8                 | 1.4                 | 1.9                 | 0.6                 | 0.6                  | 0.108   |
| Length of stay, days, mean (SD)                       | -    | -    | -    | 3.0<br>(1.9)       | 3.1<br>(2.2)       | 3.9<br>(5.2)       | 3.4<br>(2.6)       | 3.9<br>(5.0)        | 3.5<br>(3.4)        | 3.3<br>(2.2)        | 3.7<br>(3.1)        | 3.5<br>(3.2)         | 0.670   |
| Total hospital charge, \$, mean (SD)                  | -    | -    | -    | 63,869<br>(27,502) | 79,023<br>(37,357) | 96,688<br>(91,627) | 99,536<br>(56,798) | 107,345<br>(75,298) | 107,156<br>(65,753) | 121,377<br>(83,513) | 126,631<br>(89,178) | 129,716<br>(110,418) | <.001   |
| Total hospital cost, \$, mean (SD)                    | -    | -    | -    | 21,072<br>(8,398)  | 22,307<br>(9,086)  | 27,763<br>(20,558) | 26,237<br>(11,915) | 28,386<br>(18,515)  | 29,131<br>(16,280)  | 30,746<br>(18,319)  | 30,655<br>(17,370)  | 32,866<br>(23,055)   | <.001   |
| Inflation-adjusted total hospital cost, \$, mean (SD) | -    | -    | -    | 22,177<br>(8,838)  | 22,997<br>(9,367)  | 28,185<br>(21,156) | 26,237<br>(11,915) | 28,350<br>(18,491)  | 28,730<br>(16,056)  | 29,692<br>(17,691)  | 28,897<br>(16,373)  | 30,424<br>(21,342)   | <.001   |
| Cardiogenic shock (%)                                 | -    | -    | -    | 3.8                | 2.4                | 2.8                | 1.9                | 5.3                 | 2.7                 | 5.7                 | 4.2                 | 2.5                  | 0.866   |

Abbreviations: ECMO = extracorporeal membranous oxygenation; IABP = intra-aortic balloon pump; IVUS = intravascular ultrasound; LVAD = left ventricular assist device; OCT = optical coherence tomography; RRT = renal replacement therapy; SD = standard deviation

Table S9. Use of intravascular imaging across different races, hospitals, primary payer, and income

|                                 | <b>Total</b> | <b>Intravascular Imaging (+)</b> | <b>Intravascular Imaging (-)</b> |
|---------------------------------|--------------|----------------------------------|----------------------------------|
| <b>Race</b>                     |              |                                  |                                  |
| White                           | 2,221,692    | 125,768 (5.7%)                   | 2,095,924 (94.3%)                |
| Black                           | 255,421      | 14,107 (5.5%)                    | 241,314 (94.5%)                  |
| Hispanic                        | 219,707      | 12,913 (5.9%)                    | 206,794 (94.1%)                  |
| Asian                           | 67,710       | 4,317 (6.4%)                     | 63,392 (93.6%)                   |
| AI/AN                           | 17,128       | 1,232 (7.2%)                     | 15,896 (92.8%)                   |
| Other                           | 100,089      | 6,323 (6.3%)                     | 93,766 (93.7%)                   |
| <b>Hospital characteristics</b> |              |                                  |                                  |
| <b>Hospital region</b>          |              |                                  |                                  |
| Northwest                       | 512,150      | 25,429 (4.9%)                    | 486,721 (95.0%)                  |
| Midwest                         | 625,529      | 33,382 (5.3%)                    | 592,147 (94.7%)                  |
| South                           | 1,217,405    | 59,417 (4.9%)                    | 1,157,988 (91.2%)                |
| West                            | 526,663      | 46,433 (8.8%)                    | 480,230 (92.8%)                  |
| <b>Hospital bed size</b>        |              |                                  |                                  |
| Small                           | 325,519      | 18,613 (5.7%)                    | 306,906 (94.3%)                  |
| Medium                          | 759,293      | 40,120 (5.3%)                    | 719,173 (94.7%)                  |
| Large                           | 1,785,869    | 105,822 (5.9%)                   | 1,680,047 (94.1%)                |
| <b>Urban location</b>           |              |                                  |                                  |
| Rural                           | 172,796      | 9,970 (5.8%)                     | 162,826 (94.2%)                  |
| Urban non-teaching              | 923,678      | 47,878 (5.2%)                    | 875,800 (94.8%)                  |
| Urban teaching                  | 1,774,207    | 106,706 (6.0%)                   | 1,667,501 (94.0%)                |
| <b>Primary payer</b>            |              |                                  |                                  |
| Medicare                        | 1,344,242    | 77,258 (5.7%)                    | 1,266,984 (92.3%)                |
| Medicaid                        | 238,413      | 14,356 (6.0%)                    | 224,057 (94.0%)                  |
| Private insurance               | 978,990      | 57,067 (5.8%)                    | 921,923 (94.2%)                  |
| Self-pay                        | 207,108      | 10,242 (4.9%)                    | 196,865 (95.1%)                  |
| No charge                       | 19,844       | 694 (3.5%)                       | 19,150 (96.5%)                   |
| Others                          | 92,774       | 5,033 (5.4%)                     | 87,741 (94.6%)                   |
| <b>Median income</b>            |              |                                  |                                  |
| Quartile 1                      | 829,428      | 44,099 (5.3%)                    | 785,329 (94.7%)                  |
| Quartile 2                      | 781,362      | 41,722 (5.3%)                    | 739,640 (94.7%)                  |
| Quartile 3                      | 702,140      | 41,695 (5.9%)                    | 660,445 (94.1%)                  |
| Quartile 4                      | 568,816      | 37,144 (6.5%)                    | 531,672 (93.5%)                  |

Abbreviations: AI/AN = American Indian/Alaska Native

Table S10. Characteristics of percutaneous coronary intervention with and without intravascular imaging

|                                     | Intravascular Imaging (+) | Intravascular Imaging (-) | P-value |
|-------------------------------------|---------------------------|---------------------------|---------|
| <b>Unweighted sample size</b>       | 33,324                    | 550,839                   |         |
| <b>Weighted sample size</b>         | 164,660                   | 2,717,086                 |         |
| <b>Intravascular Imaging (%)</b>    |                           |                           |         |
| IVUS                                | 96.6                      | 0                         | <.001   |
| OCT                                 | 3.8                       | 0                         | <.001   |
| <b>Sex (%)</b>                      |                           |                           | 0.142   |
| Male                                | 68.5                      | 68.1                      |         |
| Female                              | 31.5                      | 31.9                      |         |
| <b>Age, mean (SD)</b>               | 63.5                      | 63.5                      | 0.647   |
| <b>Race (%)</b>                     |                           |                           | <.001   |
| White                               | 76.4                      | 77.2                      |         |
| Black                               | 8.6                       | 8.9                       |         |
| Hispanic                            | 7.8                       | 7.6                       |         |
| Asian                               | 2.6                       | 2.3                       |         |
| AI/AN                               | 0.8                       | 0.6                       |         |
| Other                               | 3.9                       | 3.5                       |         |
| <b>Comorbidities (%)</b>            |                           |                           |         |
| Smoking                             | 49.8                      | 49.2                      | 0.035   |
| Hypertension                        | 53.6                      | 55.4                      | <.001   |
| Diabetes mellitus                   | 34.3                      | 34.4                      | 0.623   |
| Hyperlipidemia                      | 71.6                      | 68.6                      | <.001   |
| Obesity                             | 18.2                      | 17.0                      | <.001   |
| Heart failure                       | 24.3                      | 20.9                      | <.001   |
| Chronic IHD                         | 93.1                      | 90.6                      | <.001   |
| Atrial fibrillation                 | 12.5                      | 11.6                      | <.001   |
| Valvular heart disease              | 6.5                       | 7.2                       | <.001   |
| Peripheral artery disease           | 6.8                       | 7.3                       | <.001   |
| Previous stroke                     | 7.0                       | 6.4                       | <.001   |
| Previous PCI                        | 9.3                       | 8.9                       | 0.003   |
| Previous CABG                       | 4.9                       | 5.8                       | <.001   |
| Previous pacemaker                  | 1.9                       | 1.7                       | 0.037   |
| Chronic pulmonary disease           | 17.3                      | 16.5                      | <.001   |
| Pulmonary hypertension              | 3.6                       | 2.6                       | <.001   |
| Chronic kidney disease              | 15.6                      | 13.9                      | <.001   |
| End-stage renal disease             | 3.0                       | 2.5                       | <.001   |
| Liver cirrhosis                     | 0.7                       | 0.5                       | <.001   |
| History of malignancy               | 7.1                       | 7.7                       | <.001   |
| Deficiency anemia                   | 2.6                       | 2.1                       | <.001   |
| Malnutrition                        | 1.3                       | 1.2                       | 0.094   |
| Dementia                            | 2.1                       | 2.3                       | 0.019   |
| Major depression                    | 0.5                       | 0.4                       | 0.003   |
| <b>Hospital characteristics (%)</b> |                           |                           |         |
| <b>Hospital region</b>              |                           |                           | <.001   |
| Northwest                           | 15.4                      | 17.8                      |         |
| Midwest                             | 20.2                      | 21.7                      |         |
| South                               | 36.1                      | 42.7                      |         |
| West                                | 28.3                      | 17.7                      |         |
| <b>Hospital bed size</b>            |                           |                           | <.001   |
| Small                               | 11.3                      | 11.4                      |         |
| Medium                              | 24.3                      | 26.4                      |         |
| Large                               | 64.4                      | 62.2                      |         |
| <b>Urban location</b>               |                           |                           | <.001   |
| Rural                               | 6.1                       | 6.2                       |         |
| Urban non-teaching                  | 29.4                      | 32.5                      |         |
| Urban teaching                      | 64.5                      | 61.3                      |         |

|                                  |      |      |       |
|----------------------------------|------|------|-------|
| <b>Primary payer (%)</b>         |      |      | <.001 |
| Medicare                         | 46.9 | 46.6 |       |
| Medicaid                         | 8.7  | 8.2  |       |
| Private insurance                | 34.7 | 34.0 |       |
| Self-pay                         | 6.2  | 7.3  |       |
| No charge                        | 0.4  | 0.7  |       |
| Others                           | 3.1  | 3.3  |       |
| <b>Median income (%)</b>         |      |      | <.001 |
| Quartile 1                       | 26.7 | 28.9 |       |
| Quartile 2                       | 25.3 | 27.2 |       |
| Quartile 3                       | 25.4 | 24.3 |       |
| Quartile 4                       | 22.7 | 19.6 |       |
| <b>Stent type (%)</b>            |      |      |       |
| Drug-eluting stent               | 86.7 | 80.1 | <.001 |
| Bare metal stent                 | 15.1 | 21.2 | <.001 |
| <b>Procedures (%)</b>            |      |      |       |
| Mechanical thrombectomy          | 9.2  | 4.7  | <.001 |
| Intra-aortic balloon pump        | 4.9  | 4.5  | <.001 |
| ECMO                             | 0.2  | 0.1  | <.001 |
| Percutaneous LVAD                | 2.8  | 1.1  | <.001 |
| Durable LVAD                     | 0.0  | 0.0  | 0.509 |
| Renal replacement therapy        | 2.7  | 2.2  | <.001 |
| Mechanical ventilation           | 4.9  | 5.2  | 0.029 |
| <b>Clinical presentation (%)</b> |      |      | <.001 |
| STEMI                            | 41.4 | 47.0 |       |
| NSTEMI                           | 58.7 | 53.0 |       |

Abbreviations: AI/AN = American Indian/Alaska Native; CABG = coronary artery bypass graft; ECMO = extracorporeal membranous oxygenation; IHD = ischemic heart disease; IVUS = intravascular ultrasound; LVAD = left ventricular assist device; NSTEMI = non-ST-elevation myocardial infarction; OCT = optical coherence tomography; PCI = percutaneous coronary intervention; SD = standard deviation; STEMI = ST-elevation myocardial infarction

Table S11. Comparison of outcomes after intravascular ultrasound and optical coherence tomography-guided percutaneous coronary intervention

|             | <b>Outcome</b>                        | <b>IVUS (+)</b> | <b>IVUS (-)</b> | <b>Crude Odds Ratio</b>          | <b>P-value</b> | <b>Adjusted Odds Ratio<sup>a</sup></b> | <b>P-value</b> |
|-------------|---------------------------------------|-----------------|-----------------|----------------------------------|----------------|----------------------------------------|----------------|
| <b>IVUS</b> | In-hospital mortality (\$)            | 2.1             | 2.8             | 0.77 (0.71-0.83)                 | <.001          | 0.71 (0.65-0.78)                       | <.001          |
|             | Length of stay (days)                 | 4.3             | 4.1             | 0.29 (0.25-0.34) <sup>b</sup>    | <.001          | 0.21 (0.17-0.25) <sup>b</sup>          | <.001          |
|             | Total hospital cost <sup>c</sup> (\$) | 28,872          | 23,211          | 5,661 (5,463-5,858) <sup>b</sup> | <.001          | 3,990 (3,828-4,152) <sup>b</sup>       | <.001          |
|             | <b>Outcome</b>                        | <b>OCT (+)</b>  | <b>OCT (-)</b>  | <b>Crude Odds Ratio</b>          | <b>P-value</b> | <b>Adjusted Odds Ratio<sup>a</sup></b> | <b>P-value</b> |
| <b>OCT</b>  | In-hospital mortality (%)             | 1.1             | 2.8             | 0.38 (0.21-0.66)                 | 0.001          | 0.59 (0.30-1.15)                       | 0.123          |
|             | Length of stay (days)                 | 3.4             | 3.7             | 0.25 (0.01-0.49) <sup>b</sup>    | 0.037          | 0.06 ([-0.15]-0.26) <sup>b</sup>       | 0.586          |
|             | Total hospital cost <sup>c</sup> (\$) | 27,581          | 23,211          | 4,370 (3,364-5,376) <sup>b</sup> | <.001          | 4,402 (3,581-5,224) <sup>b</sup>       | <.001          |

<sup>a</sup>Adjusted for sex, age, comorbidities, hospital characteristics, primary payer, median income, clinical presentation, and procedural characteristics

<sup>b</sup>Mean difference with 95% confidence interval

<sup>c</sup>Inflation-adjusted total hospital cost, rounded to the nearest United States dollar

Abbreviations: IVUS = intravascular ultrasound; OCT = optical coherence tomography

Figure S1. Flow chart of this study

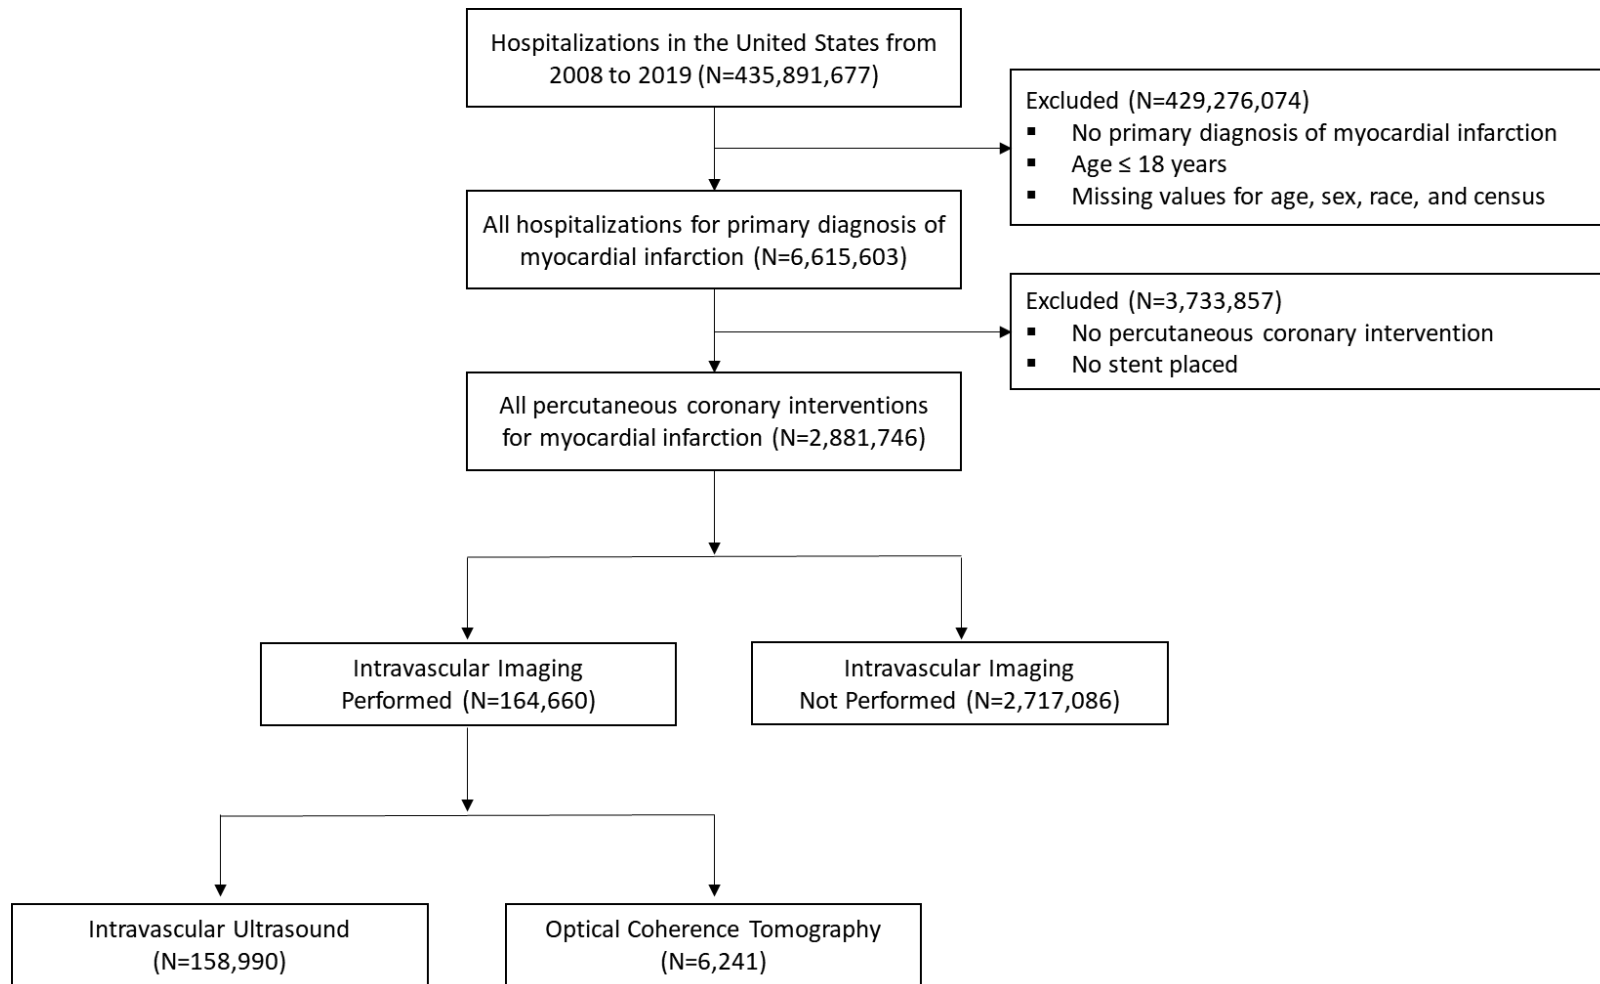

Supplement: mmc1.pdf [file mmc1.pdf]
